# Supplementary material
Source: publisher figshare collection journal article supplement (https://tandf.figshare.com/ndownloader/files/21654303)
Supplement: Supplementary file 1 [file 21654303]

**Supplemental Table 1. Atopic Dermatitis-Related Itching Concept Elicitation (Saturation) Grid**

| <b>Concepts Elicited in Focus Group</b>                                                   | <b>Group 1<br/>(n = 7)</b> | <b>Group 2<br/>(n = 9)</b> | <b>Group 3<sup>a</sup><br/>(n = 9)</b> | <b>Group 4<br/>(n = 8)</b> | <b>Group 5<br/>(n = 8)</b> | <b>Group 6<sup>a</sup><br/>(n = 8)</b> | <b>Total<br/>(S)</b> |
|-------------------------------------------------------------------------------------------|----------------------------|----------------------------|----------------------------------------|----------------------------|----------------------------|----------------------------------------|----------------------|
| Itch severity (intense, crazy, extreme, drive you crazy, cannot ignore, cannot relieve)   | S                          | S                          | S                                      | S                          | S                          | S                                      | 6                    |
| Evening/nighttime itching (in bed, getting ready for bed, bedtime, during sleeping hours) | S                          | S                          | S                                      | S                          | S                          | S                                      | 6                    |
| Morning itching                                                                           | S                          | S                          | P                                      | S                          | S                          | S                                      | 5                    |
| Daytime itching                                                                           | S                          | S                          | S                                      | S                          | S                          | P                                      | 5                    |
| Time spent itching (constant, all day, continuous, entire time)                           | S                          | S                          | P                                      | S                          | S                          | S                                      | 5                    |
| Sleep problems                                                                            | S                          | P                          | P                                      | S                          | S                          | S                                      | 4                    |
| Size of itchy areas                                                                       |                            | S                          | P                                      | P                          | S                          | S                                      | 3                    |
| Delay or disruption of daytime activities                                                 | S                          | P                          | P                                      | S                          | P                          | P                                      | 2                    |
| Duration of itching episodes                                                              | P                          | P                          | S                                      | P                          | P                          |                                        | 1                    |
| Number of itching episodes                                                                | P                          | P                          | P                                      | S                          | P                          |                                        | 1                    |
| Number of itchy areas                                                                     | P                          |                            | P                                      |                            | S                          | P                                      | 1                    |

S = spontaneously mentioned by at least 1 participant; P = endorsed by at least 1 participant when probed.

<sup>a</sup> Adolescent group.
